# Supplementary material
Source: PubMed Central journal article supplement (PMC218772)
Supplement: pnas_2133846100_1.pdf [file pnas_2133846100_1.pdf]

**Table 1. Yeast two-hybrid analysis of class E VPS factor interactions**

| VP16-activation domain fusion |            | GAL4 DNA-binding domain fusion |             |             |             |             |             |             |             |             |        |            |            |             |             |             |       |
|-------------------------------|------------|--------------------------------|-------------|-------------|-------------|-------------|-------------|-------------|-------------|-------------|--------|------------|------------|-------------|-------------|-------------|-------|
|                               |            | ESCRT-I                        | ESCRT-II    |             |             | ESCRT-III   |             |             |             |             |        |            |            |             | Other       |             |       |
|                               |            | Tsg101                         | EAP45       | EAP20       | EAP30       | CHMP6       | CHMP4A      | CHMP4B      | CHMP4C      | CHMP2A      | CHMP2B | CHMP3      | CHMP1A     | CHMP1B      | AIP-1/ALIX  | VPS4        | None  |
| ESCRT-I                       | Tsg101     | 2.12 ± 0.31                    | <0.05       | <0.05       | <0.05       | <0.05       | <0.05       | <0.20       | <0.14       | <0.05       | <0.05  | <0.05      | <0.05      | <0.05       | <0.05       | <0.05       | <0.05 |
|                               | VPS 28     | 3.28 ± 0.23                    | <0.05       | <0.05       | <0.05       | <0.05       | <0.05       | <0.20       | <0.14       | <0.05       | <0.05  | <0.05      | <0.05      | <0.05       | <0.05       | <0.05       | <0.05 |
| ESCRT-II                      | EAP45      | <0.05                          | <0.05       | 2.1 ± 0.09  | 3.57 ± 0.15 | 0.05 ± 0.01 | <0.05       | <0.20       | <0.14       | <0.05       | <0.05  | <0.05      | <0.05      | <0.05       | <0.05       | <0.05       | <0.05 |
|                               | EAP20      | <0.05                          | 3.33 ± 0.06 | <0.05       | 3.66 ± 0.14 | 3.49 ± 0.10 | <0.05       | <0.20       | <0.14       | <0.05       | <0.05  | <0.05      | <0.05      | <0.05       | <0.05       | <0.05       | <0.05 |
|                               | EAP30      | <0.05                          | 3.51 ± 0.03 | 3.53 ± 0.11 | 0.97 ± 0.08 | 0.98 ± 0.14 | <0.05       | <0.20       | <0.14       | <0.05       | <0.05  | <0.05      | <0.05      | <0.05       | <0.05       | <0.05       | <0.05 |
| ESCRT-III                     | CHMP 6     | <0.05                          | 0.65 ± 0.10 | 3.47 ± 0.17 | 3.27 ± 0.33 | <0.05       | 1.66 ± 0.21 | 3.54 ± 0.13 | 2.82 ± 0.20 | <0.05       | <0.05  | <0.05      | <0.05      | <0.05       | <0.05       | <0.05       | <0.05 |
|                               | CHMP4A     | <0.05                          | <0.05       | <0.05       | <0.05       | <0.05       | 2.84 ± 0.27 | 3.22 ± 0.14 | 2.08 ± 0.15 | <0.05       | <0.05  | <0.05      | <0.05      | <0.05       | 3.3 ± 0.04  | <0.05       | <0.05 |
|                               | CHMP4B     | <0.05                          | <0.05       | <0.05       | <0.05       | <0.05       | 0.85 ± 0.15 | 1.60 ± 0.19 | 0.79 ± 0.16 | <0.05       | <0.05  | <0.05      | <0.05      | <0.05       | 2.27 ± 0.66 | <0.05       | <0.05 |
|                               | CHMP4C     | <0.05                          | <0.05       | <0.05       | <0.05       | <0.05       | 0.64 ± 0.15 | 1.73 ± 0.09 | 2.93 ± 0.66 | <0.05       | <0.05  | <0.05      | <0.05      | <0.05       | 1.85 ± 0.19 | <0.05       | <0.05 |
|                               | CHMP 5     | <0.05                          | <0.05       | <0.05       | <0.05       | <0.05       | <0.05       | <0.20       | <0.14       | <0.05       | <0.05  | <0.05      | <0.05      | <0.05       | <0.05       | <0.05       | <0.05 |
|                               | CHMP2A     | <0.05                          | <0.05       | <0.05       | <0.05       | <0.05       | 0.83 ± 0.18 | <0.20       | <0.14       | <0.05       | <0.05  | <0.05      | <0.05      | <0.05       | <0.05       | 3.32 ± 0.02 | <0.05 |
|                               | CHMP2B     | <0.05                          | <0.05       | <0.05       | <0.05       | <0.05       | <0.05       | <0.20       | <0.14       | <0.05       | <0.05  | <0.05      | <0.05      | <0.05       | <0.05       | <0.05       | <0.05 |
|                               | CHMP3      | <0.05                          | <0.05       | <0.05       | <0.05       | <0.05       | <0.05       | <0.20       | <0.14       | 3.76 ± 0.26 | <0.05  | <0.05      | <0.05      | <0.05       | <0.05       | <0.05       | <0.05 |
|                               | CHMP1A     | <0.08                          | <0.08       | <0.08       | <0.08       | <0.08       | <0.08       | <0.20       | <0.14       | <0.08       | <0.08  | 0.5 ± 0.12 | 0.13 ± .03 | 0.16 ± 0.02 | 3.18 ± 0.41 | 0.08 ± 0.02 | <0.05 |
|                               | CHMP1B     | <0.05                          | <0.05       | <0.05       | <0.05       | <0.05       | <0.05       | <0.20       | <0.14       | <0.05       | <0.05  | <0.05      | 0.8 ± 0.06 | <0.05       | <0.05       | 2.94 ± 0.17 | <0.05 |
| Other                         | AIP-1/ALIX | 0.33 ± 0.01                    | <0.05       | <0.05       | <0.05       | <0.05       | 3.34 ± 0.08 | 2.73 ± 0.94 | 3.03 ± 0.20 | <0.05       | <0.05  | <0.05      | <0.05      | <0.05       | 0.54 ± 0.83 | <0.05       | <0.05 |
|                               | VPS4       | <0.05                          | <0.05       | <0.05       | <0.05       | 0.08 ± 0.01 | <0.05       | <0.20       | <0.14       | 3.4 ± 0.05  | <0.05  | <0.05      | 3.4 ± 0.14 | 2.71 ± .32  | <0.05       | <0.05       | <0.05 |
|                               | Hrs        | 1.88 ± 0.38                    | <0.05       | <0.05       | <0.05       | <0.05       | <0.05       | <0.20       | <0.14       | <0.05       | <0.05  | <0.05      | <0.05      | <0.05       | <0.05       | <0.05       | <0.05 |
|                               | None       | <0.05                          | <0.05       | <0.05       | <0.05       | <0.05       | 0.20        | 0.14        | <0.05       | <0.05       | <0.05  | <0.05      | <0.05      | <0.05       | <0.05       | <0.05       | <0.05 |

Each of the mammalian class E VPS factors was screened in the yeast two-hybrid assay for interaction with each of the others. The table shows the mean ± SD of optical density values obtained in a liquid β-galactosidase assay performed on three independent pools of yeast transformants. Positive signals are indicated by shading. Very weak signals obtained with GAL4-CHMP1B/VP16-CHMP1A, GAL4-ALIX/VP16-CHMP1A, and GAL4-CHMP-6/VP16-VPS4 were less than 2-fold above background and were not considered positive. Of these transformants, only the CHMP1A:CHMP1B interaction was found to be detectable by coprecipitation analysis. The GAL4 DNA-binding domain fusions of VPS28, HMP5, and Hrs were strong transcriptional activators in the absence of a coexpressed VP16-activation domain fusion protein and were therefore excluded from the analysis.
