# Supplementary material
Source: PubMed Central journal article supplement (PMC218772)

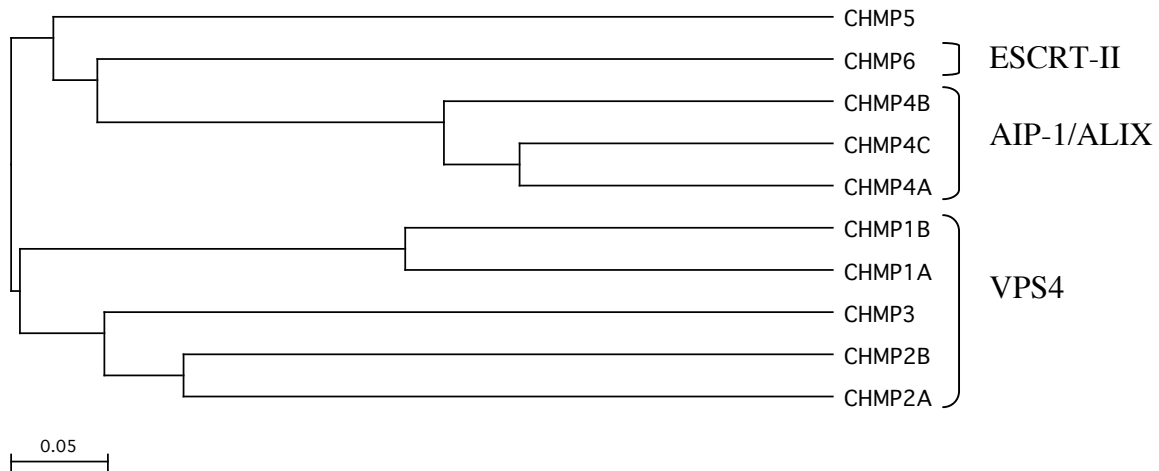

Supplement: pnas_2133846100_3.pdf [file pnas_2133846100_3.pdf]
